# Supplementary material for: Childhood growth and development and DNA methylation age in mid-life
Source: bioRxiv or medRxiv preprint supplement (doi:10.1101/2020.12.02.20242529), 2020-12-04
Supplement: Supplementary file [file media-1.pdf]

## **Supplementary Material**

### **Childhood growth and development and DNA methylation age in mid-life**

Jane Maddock PhD, Juan Castillo-Fernandez PhD, Andrew Wong PhD, George B Ploubidis PhD, Diana Kuh PhD, Jordana T Bell DPhil, Rebecca Hardy PhD

**Supplementary table 1.** Comparison of participants included in this analytical sample versus all other participants responding to 53 year data collection

|                                                | Included (n=1376) |               |  | Not included (n=1,659) |               |         |
|------------------------------------------------|-------------------|---------------|--|------------------------|---------------|---------|
|                                                | n                 |               |  | n                      |               | P-value |
| <i>Weight (kg), mean (SD)</i>                  |                   |               |  |                        |               |         |
| At birth                                       | 1,375             | 3.40 (0.51)   |  | 1,650                  | 3.39 (0.50)   | 0.77    |
| At 2 years                                     | 1,203             | 12.88 (1.49)  |  | 1,331                  | 12.95 (1.52)  | 0.22    |
| At 4 years                                     | 1,298             | 17.12 (2.08)  |  | 1,423                  | 17.37 (2.20)  | 0.003   |
| At 7 years                                     | 1,299             | 22.70 (2.99)  |  | 1,223                  | 22.91 (3.14)  | 0.08    |
| At 15 years                                    | 1,232             | 51.68 (9.18)  |  | 1,113                  | 51.98 (8.52)  | 0.42    |
| <i>Height (cm) , mean (SD)</i>                 |                   |               |  |                        |               |         |
| At 2 years                                     | 1,174             | 85.45 (4.81)  |  | 1,296                  | 85.18 (5.11)  | 0.19    |
| At 4 years                                     | 1,264             | 102.99 (5.02) |  | 1,400                  | 103.35 (5.11) | 0.06    |
| At 7 years                                     | 1,334             | 119.95 (5.64) |  | 1,280                  | 120.07 (5.56) | 0.58    |
| At 15 years                                    | 1,234             | 160.39 (8.00) |  | 1,116                  | 160.25 (7.63) | 0.65    |
| <i>Pubertal Stage at 14-15 years (men), %</i>  |                   |               |  |                        |               |         |
| Fully mature                                   | 172               | 26.2          |  | 125                    | 22.9          | 0.19    |
| Later puberty                                  | 484               | 73.9          |  | 420                    | 77.1          |         |
| <i>Age at menarche (y) (women) , mean (SD)</i> |                   |               |  |                        |               |         |
|                                                | 617               | 13.1 (1.3)    |  | 610                    | 13.0 (1.2)    | 0.11    |
| <i>Socioeconomic position (%)</i>              |                   |               |  |                        |               |         |
| Non-manual                                     | 891               | 66.79         |  | 1,042                  | 66.79         | 0.99    |
| Manual                                         | 443               | 33.21         |  | 518                    | 33.21         |         |
| <i>Smoking status</i>                          |                   |               |  |                        |               |         |
| Current smoker                                 | 333               | 24.22         |  | 362                    | 22.44         | 0.24    |
| Ex-smoker                                      | 630               | 45.82         |  | 788                    | 48.85         |         |
| Never smoker                                   | 412               | 29.96         |  | 463                    | 28.70         |         |

\*Fully mature group are the group who experienced the earliest pubertal timing

| Supplementary table 2. DNAm Age Acceleration at 53 years and SITAR height-tempo |     |                        |         |                      |         |                      |         |                        |         |
|---------------------------------------------------------------------------------|-----|------------------------|---------|----------------------|---------|----------------------|---------|------------------------|---------|
|                                                                                 |     | AgeAccelHannum         |         | AgeAccelHorvath      |         | AgeAccelLevine       |         | AgeAccelGrim           |         |
|                                                                                 | N   | Coefficient (95% CI)   | P value | Coefficient (95% CI) | P value | Coefficient (95% CI) | P value | Coefficient (95% CI)   | P value |
| <i>Women</i>                                                                    |     |                        |         |                      |         |                      |         |                        |         |
| Height tempo (years)                                                            | 720 | 0.01 (-0.03, 0.06)     | 0.49    | -0.02 (-0.06, 0.02)  | 0.35    | -0.02 (-0.08, 0.03)  | 0.42    | 0.02 (-0.02, 0.07)     | 0.33    |
|                                                                                 |     |                        |         |                      |         |                      |         |                        |         |
| <i>Men</i>                                                                      |     |                        |         |                      |         |                      |         |                        |         |
| Height tempo (years)                                                            | 656 | -0.050 (-0.101, 0.002) | 0.06    | -0.02 (-0.07, 0.03)  | 0.38    | -0.04 (-0.10, 0.03)  | 0.30    | -0.001 (-0.063, 0.061) | 0.97    |
| Adjusted for age at interview (in months) at 53 years                           |     |                        |         |                      |         |                      |         |                        |         |

| <b>Supplementary table 3.</b> DNAm Age Acceleration at 53 years and conditional growth adjusted for estimated cell composition                                     |       |                      |         |                      |         |                      |         |                      |         |
|--------------------------------------------------------------------------------------------------------------------------------------------------------------------|-------|----------------------|---------|----------------------|---------|----------------------|---------|----------------------|---------|
|                                                                                                                                                                    |       | AgeAccelHannum       |         | AgeAccelHorvath      |         | AgeAccelLevine       |         | AgeAccelGrim         |         |
|                                                                                                                                                                    | N     | Coefficient (95% CI) | P value | Coefficient (95% CI) | P value | Coefficient (95% CI) | P value | Coefficient (95% CI) | P value |
| <i>Relative weight gain</i>                                                                                                                                        |       |                      |         |                      |         |                      |         |                      |         |
| RWG between birth and 2 years                                                                                                                                      | 1,127 | -0.12 (-0.34, 0.10)  | 0.29    | -0.09 (-0.33, 0.14)  | 0.44    | -0.11 (-0.40, 0.18)  | 0.47    | -0.12 (-0.39, 0.16)  | 0.40    |
| RWG between 2 and 4 years                                                                                                                                          | 1,065 | 0.12 (-0.11, 0.34)   | 0.31    | 0.21 (-0.04, 0.45)   | 0.10    | -0.01 (-0.31, 0.29)  | 0.95    | -0.07 (-0.35, 0.22)  | 0.65    |
| RWG between 4 and 7 years                                                                                                                                          | 1,168 | -0.10 (-0.32, 0.13)  | 0.37    | -0.08 (-0.33, 0.16)  | 0.50    | 0.14 (-0.16, 0.43)   | 0.36    | 0.11 (-0.18, 0.39)   | 0.46    |
| RWG between 7 and 15 years                                                                                                                                         | 1,161 | 0.15 (-0.06, 0.36)   | 0.16    | 0.02 (-0.22, 0.25)   | 0.88    | 0.21 (-0.08, 0.49)   | 0.16    | 0.40 (0.13, 0.68)    | <0.001  |
| <i>Linear growth</i>                                                                                                                                               |       |                      |         |                      |         |                      |         |                      |         |
| CLG between 2 and 4 years                                                                                                                                          | 1,085 | 0.09 (-0.13, 0.31)   | 0.44    | 0.15 (-0.10, 0.39)   | 0.24    | -0.20 (-0.50, 0.10)  | 0.18    | -0.18 (-0.46, 0.10)  | 0.21    |
| CLG between 4 and 7 years                                                                                                                                          | 1,204 | 0.03 (-0.17, 0.23)   | 0.77    | -0.03 (-0.25, 0.19)  | 0.78    | 0.07 (-0.19, 0.34)   | 0.60    | -0.04 (-0.29, 0.22)  | 0.77    |
| CLG between 7 and 15 years                                                                                                                                         | 1,174 | 0.04 (-0.16, 0.25)   | 0.67    | -0.01 (-0.24, 0.21)  | 0.90    | -0.07 (-0.34, 0.21)  | 0.64    | 0.16 (-0.11, 0.43)   | 0.24    |
| Adjusted for age in months at 53 years and sex.                                                                                                                    |       |                      |         |                      |         |                      |         |                      |         |
| RWG: Relative weight gain i.e. standardised residuals from regression of present weight z-score on previous weight and height z-scores and present height z-scores |       |                      |         |                      |         |                      |         |                      |         |
| CLG: Conditional linear growth i.e. Standardised residuals from regression of present height z-score on previous height and weight z-scores                        |       |                      |         |                      |         |                      |         |                      |         |

| Supplementary table 4. DNAm Age Acceleration at 53 years and pubertal timing adjusted for estimated cell composition |     |                      |         |                       |         |                      |         |                      |         |
|----------------------------------------------------------------------------------------------------------------------|-----|----------------------|---------|-----------------------|---------|----------------------|---------|----------------------|---------|
|                                                                                                                      |     | AgeAccelHannum       |         | AgeAccelHorvath       |         | AgeAccelLevine       |         | AgeAccelGrim         |         |
|                                                                                                                      | N   | Coefficient (95% CI) | P value | Coefficient (95% CI)  | P value | Coefficient (95% CI) | P value | Coefficient (95% CI) | P value |
| <i>Women</i>                                                                                                         |     |                      |         |                       |         |                      |         |                      |         |
| Age at menarche (years)                                                                                              | 617 | -0.01 (-0.23, 0.20)  | 0.92    | 0.003 (-0.240, 0.245) | 0.98    | -0.23 (-0.53, 0.07)  | 0.13    | 0.07 (-0.22, 0.35)   | 0.66    |
| Age at menarche                                                                                                      |     |                      |         |                       |         |                      |         |                      |         |
| <12 years                                                                                                            | 96  | Ref.                 |         | Ref.                  |         | Ref.                 |         | Ref.                 |         |
| ≥12 years                                                                                                            | 521 | 0.02 (-0.73, 0.76)   | 0.97    | 0.16 (-0.68, 1.00)    | 0.70    | -0.04 (-1.09, 1.00)  | 0.94    | 0.53 (-0.46, 1.53)   | 0.29    |
| <i>Men: Pubertal status at 14-15 years</i>                                                                           |     |                      |         |                       |         |                      |         |                      |         |
| Fully mature*                                                                                                        | 172 | Ref.                 |         | Ref.                  |         | Ref.                 |         | Ref.                 |         |
| Advanced puberty                                                                                                     | 211 | 0.14 (-0.62, 0.89)   | 0.27**  | -0.40 (-1.22, 0.42)   | 0.80**  | 0.93 (-0.05, 1.90)   | 0.05**  | -0.31 (-1.26, 0.64)  | 0.78**  |
| Early puberty                                                                                                        | 200 | 0.62 (-0.14, 1.39)   |         | -0.13 (-0.97, 0.70)   |         | 0.82 (-0.17, 1.81)   |         | 0.15 (-0.82, 1.12)   |         |
| Pre-pubertal                                                                                                         | 73  | -0.18 (-1.21, 0.84)  |         | -0.28 (-1.40, 0.84)   |         | -0.52 (-1.84, 0.81)  |         | -0.18 (-1.48, 1.11)  |         |
| Fully mature                                                                                                         | 172 | Ref.                 |         | Ref.                  |         | Ref.                 |         | Ref.                 |         |

|                                                                                                                                                                                                              |     |                    |      |                     |      |                    |      |                     |      |
|--------------------------------------------------------------------------------------------------------------------------------------------------------------------------------------------------------------|-----|--------------------|------|---------------------|------|--------------------|------|---------------------|------|
| Later puberty                                                                                                                                                                                                | 484 | 0.29 (-0.36, 0.94) | 0.38 | -0.27 (-0.98, 0.44) | 0.45 | 0.67 (-0.18, 1.51) | 0.12 | -0.10 (-0.92, 0.72) | 0.81 |
| Adjusted for age in months at 53 years. *Fully mature group are the group who experienced the earliest pubertal timing. **p-value from lrtest comparing models with and without categorical puberty variable |     |                    |      |                     |      |                    |      |                     |      |

| Supplementary table 5. DNAm Age Acceleration at 60-64 years and conditional growth |     |                      |         |                      |         |                      |         |                      |         |
|------------------------------------------------------------------------------------|-----|----------------------|---------|----------------------|---------|----------------------|---------|----------------------|---------|
|                                                                                    |     | AgeAccelHannum       |         | AgeAccelHorvath      |         | AgeAccelLevine       |         | AgeAccelGrim         |         |
|                                                                                    | N   | Coefficient (95% CI) | P value | Coefficient (95% CI) | P value | Coefficient (95% CI) | P value | Coefficient (95% CI) | P value |
| <i>Relative weight gain</i>                                                        |     |                      |         |                      |         |                      |         |                      |         |
| RWG between birth and 2 years                                                      | 402 | -0.11 (-0.55, 0.33)  | 0.61    | -0.11 (-0.58, 0.36)  | 0.64    | -0.21 (-0.83, 0.41)  | 0.51    | -0.50 (-0.95, -0.05) | 0.03    |
| RWG between 2 and 4 years                                                          | 385 | 0.51 (0.08, 0.95)    | 0.02    | 0.59 (0.13, 1.06)    | 0.01    | 0.54 (-0.07, 0.40)   | 0.08    | 0.05 (-0.41, 0.50)   | 0.84    |
| RWG between 4 and 7 years                                                          | 441 | -0.39 (-0.80, 0.03)  | 0.07    | -0.12 (-0.57, 0.33)  | 0.61    | -0.20 (-0.79, 0.40)  | 0.52    | -0.35 (-0.79, 0.10)  | 0.13    |
| RWG between 7 and 15 years                                                         | 450 | 0.17 (-0.19, 0.54)   | 0.35    | 0.03 (-0.39, 0.45)   | 0.89    | 0.69 (0.12, 1.26)    | 0.02    | 0.38 (-0.04, 0.79)   | 0.08    |
| <i>Linear growth</i>                                                               |     |                      |         |                      |         |                      |         |                      |         |
| CLG between 2 and 4 years                                                          | 393 | -0.16 (-0.59, 0.26)  | 0.45    | 0.21 (-0.25, 0.66)   | 0.37    | -0.37 (-0.97, 0.22)  | 0.22    | -0.10 (-0.54, 0.34)  | 0.66    |
| CLG between 4 and 7 years                                                          | 441 | -0.11 (-0.48, 0.26)  | 0.55    | -0.27 (-0.66, 0.13)  | 0.19    | -0.17 (-0.69, 0.36)  | 0.54    | -0.07 (-0.47, 0.32)  | 0.71    |

|                            |     |                    |      |                   |      |                   |      |                    |      |
|----------------------------|-----|--------------------|------|-------------------|------|-------------------|------|--------------------|------|
|                            |     |                    |      |                   |      |                   |      |                    |      |
| CLG between 7 and 15 years | 454 | 0.14 (-0.23, 0.50) | 0.46 | 0.51 (0.09, 0.93) | 0.02 | 0.72 (0.16, 1.29) | 0.01 | 0.26 (-0.16, 0.67) | 0.23 |

Adjusted for age in months at 60-64 years and sex.

RWG: Relative weight gain i.e. standardised residuals from regression of present weight z-score on previous weight and height z-scores and present height z-score

CLG: Conditional linear growth i.e. Standardised residuals from regression of present height z-score on previous height and weight z-scores



| Supplementary table 6. DNAm Age Acceleration at 60-64 years and pubertal timing |     |                      |         |                      |         |                      |         |                      |         |
|---------------------------------------------------------------------------------|-----|----------------------|---------|----------------------|---------|----------------------|---------|----------------------|---------|
|                                                                                 |     | AgeAccelHannum       |         | AgeAccelHorvath      |         | AgeAccelLevine       |         | AgeAccelGrim         |         |
|                                                                                 | N   | Coefficient (95% CI) | P value | Coefficient (95% CI) | P value | Coefficient (95% CI) | P value | Coefficient (95% CI) | P value |
| <i>Women</i>                                                                    |     |                      |         |                      |         |                      |         |                      |         |
| Age at menarche (years)                                                         | 212 | 0.26 (-0.14, 0.66)   | 0.19    | 0.55 (0.13, 0.97)    | 0.01    | 0.653 (0.002, 1.305) | 0.049   | 0.38 (-0.09, 0.85)   | 0.11    |
| Age at menarche                                                                 |     |                      |         |                      |         |                      |         |                      |         |
| <12 years                                                                       | 34  |                      |         |                      |         |                      |         |                      |         |
| ≥12 years                                                                       | 178 | 1.34 (-0.02, 2.70)   | 0.05    | 1.09 (-0.36, 2.55)   | 0.14    | 2.13 (-0.09, 4.36)   | 0.06    | 1.50 (-0.09, 3.10)   | 0.06    |
| <i>Men: Pubertal status at 14-15 years</i>                                      |     |                      |         |                      |         |                      |         |                      |         |
| Fully mature*                                                                   | 73  | Ref.                 |         | Ref.                 |         | Ref.                 |         | Ref.                 |         |
| Advanced puberty                                                                | 92  | -0.70 (-2.11, 0.71)  | 0.07**  | -0.44 (-1.96, 1.08)  | 0.28**  | -0.70 (-2.54, 1.14)  | 0.62**  | -1.29 (-2.68, 0.09)  | 0.10**  |
| Early puberty                                                                   | 81  | -0.41 (-1.86, 1.04)  |         | -1.06 (-2.62, 0.50)  |         | -1.65 (-3.54, 0.25)  |         | -1.23 (-2.66, 0.20)  |         |
| Pre-pubertal                                                                    | 24  | -1.76 (-3.88, 0.35)  |         | -1.80 (-4.08, 0.49)  |         | -1.85 (-4.62, 0.92)  |         | -1.29 (-3.38, 0.79)  |         |
|                                                                                 |     |                      |         |                      |         |                      |         |                      |         |
| Fully mature                                                                    | 73  | Ref.                 |         | Ref.                 |         | Ref.                 |         | Ref.                 |         |
| Later puberty                                                                   | 197 | -0.72 (-1.95, 0.51)  | 0.25    | -0.86 (-2.19, 0.46)  | 0.20    | -1.23 (-2.84, 0.37)  | 0.13    | -1.27 (-2.47, -0.06) | 0.04    |

Adjusted for age in months at 60-64 years. \*Fully mature group are the group who experienced the earliest pubertal timing. \*\*p-value from lrtest comparing models with and without categorical puberty variable
